# Supplementary material
Source: PubMed Central journal article supplement (PMC5437890)
Supplement: npp2016277x1.pdf [file npp2016277x1.pdf]

# Supplemental Table 1

## ANOVAs for all measures included in factor analysis

| <b>Group effects from a two-way ANOVA (p-values)</b> | <b>Genotype</b> | <b>Dox</b> | <b>Interaction</b> |
|------------------------------------------------------|-----------------|------------|--------------------|
| DRL: burst responses                                 | 0.0857          | 0.1728     | 0.0261             |
| DRL: peak response latency                           | 0.0030          | 0.2396     | 0.0113             |
| Go/No-Go: False Alarm Rate                           | 0.0792          | 0.9309     | 0.3486             |
| Go/No-Go: Hit Rate                                   | 0.1385          | 0.5716     | 0.3985             |
| Open Field Activity                                  | 0.6539          | 0.2817     | 0.9842             |
| Progressive Ratio Lever Presses                      | <.0001          | <.0001     | 0.0005             |
| Delayed Discounting Slope                            | 0.1492          | 0.7590     | 0.3841             |
| Probabilistic Discounting Slope                      | 0.1376          | 0.5199     | 0.5699             |

| <b>Effect of sex from a three-way ANOVA (p-values)</b> | <b>Sex</b> | <b>Sex x Genotype</b> |
|--------------------------------------------------------|------------|-----------------------|
| DRL: burst responses                                   | 0.0235     | 0.8248                |
| DRL: peak response latency                             | 0.0067     | 0.4797                |
| Go/No-Go: False Alarm Rate                             | 0.0687     | 0.1098                |
| Go/No-Go: Hit Rate                                     | 0.6279     | 0.7840                |
| Open Field Activity                                    | 0.0479     | 0.4281                |
| Progressive Ratio Lever Presses                        | 0.3370     | 0.3511                |
| Delayed Discounting Slope                              | 0.1826     | 0.2462                |
| Probabilistic Discounting Slope                        | 0.0227     | 0.0263                |

# Supplemental Figure 1

## Distribution of lever presses in DRL

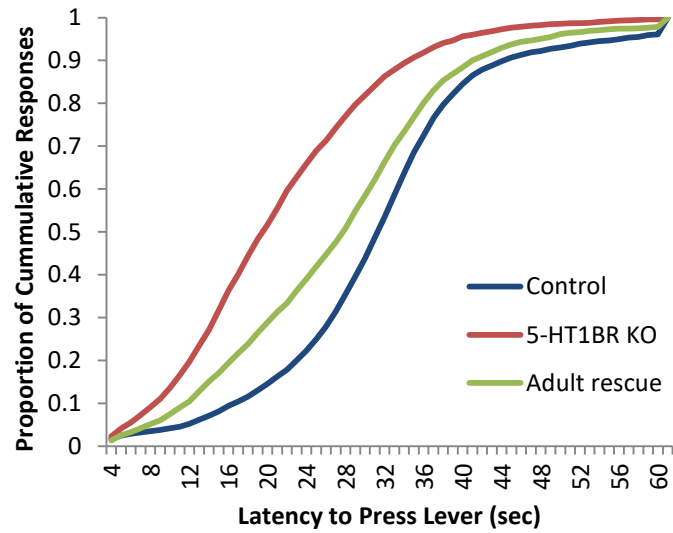

# Supplemental Figure 2

## Sex by genotype interaction for probabilistic discounting

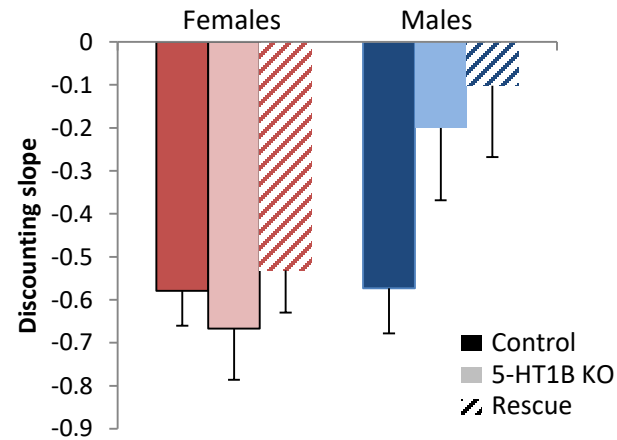

# Supplemental Table 2

## Three factor model

| Three-factor model              | <b>Factor1</b> | <b>Factor2</b> | <b>Factor 3</b> |
|---------------------------------|----------------|----------------|-----------------|
| DRL: burst responses            | <b>0.624</b>   | 0.117          | -0.014          |
| DRL: peak response latency      | <b>-0.665</b>  | -0.017         | -0.161          |
| Go/No-Go: False Alarm Rate      | 0.005          | <b>0.999</b>   | 0.001           |
| Go/No-Go: Hit Rate              | <b>0.271</b>   | 0.234          | 0.007           |
| Open Field Activity             | <b>0.433</b>   | -0.097         | -0.043          |
| Progressive Ratio Lever Presses | <b>0.953</b>   | -0.083         | 0.008           |
| Delayed Discounting Slope       | -0.027         | 0.047          | <b>0.455</b>    |
| Probabilistic Discounting Slope | 0.008          | -0.012         | <b>1.006</b>    |
| Correlation of factors          | 1.000          |                |                 |
|                                 | 0.561          | 1.000          |                 |
|                                 | 0.199          | 0.251          | 1.000           |

# Supplemental Table 3

## Exploratory Factor Analysis in Controls Only

| <b>Two-factor model</b>         | <b>Factor1</b> | <b>Factor2</b> |
|---------------------------------|----------------|----------------|
| DRL: burst responses            | <b>0.433</b>   | -0.303         |
| DRL: peak response latency      | <b>0.819</b>   | 0.076          |
| Go/No-Go: False Alarm Rate      | <b>-0.736</b>  | 0.133          |
| Go/No-Go: Hit Rate              | <b>0.814</b>   | -0.015         |
| Open Field Activity             | <b>0.709</b>   | 0.218          |
| Progressive Ratio Lever Presses | <b>0.315</b>   | 0.015          |
| Delayed Discounting Slope       | -0.002         | <b>1.003</b>   |
| Probabilistic Discounting Slope | 0.146          | <b>0.500</b>   |
| Correlation of factors          | 1.000          |                |
|                                 | -0.002         | 1.000          |
